# Supplementary material
Source: publisher site journal article supplement (https://www.kjim.org/upload/media/kjim-2022-072-suppl3.pdf)
Supplement: Supplementary file 1 [file kjim-2022-072-suppl3.pdf]

**Supplementary Table 3. Bronchoalveolar lavage total and differential cell counts (%) in five patients with COVID-19 vaccine-related pneumonitis**

|                            | Patient #2 | Patient #4    | Patient #6 | Patient #7 | Patient #8 |
|----------------------------|------------|---------------|------------|------------|------------|
| Total WBC count, / $\mu$ L | 778        | Not performed | 344        | 2,373      | 1,344      |
| Neutrophils, %             | 24         | 4             | 29         | 0          | 4          |
| Lymphocytes, %             | 32         | 49            | 32         | 92         | 53         |
| Eosinophils, %             | 32         | 29            | 2          | 7          | 9          |
| Macrophages, %             | 12         | 18            | 37         | 1          | 34         |

There were no findings of alveolar hemorrhage in any BAL specimens.  
COVID-19, coronavirus disease 2019; WBC, white blood cell.
